# Supplementary material
Source: Royal Society of Chemistry journal article supplement (https://www.rsc.org/suppdata/nj/1999/965/906512a.pdf)
Supplement: Supplementary file 1 [file 906512a.pdf]

## Supporting Information

### Fluoride ligands exhibit marked departures from the hydrogen bond acceptor behavior of its heavier halogen congeners

Lee Brammer,<sup>\*a</sup> Eric A. Bruton,<sup>a</sup> and Paul Sherwood<sup>b</sup>

<sup>a</sup> Department of Chemistry, University of Missouri-St. Louis, 8001 Natural Bridge Road, St. Louis, MO 63121-4499, USA. E-mail: lee.brammer@umsl.edu

<sup>b</sup> Computational Science and Engineering Department, CLRC Daresbury Laboratory, Daresbury, Warrington, WA4 4AD, UK

**Table S1.** Model geometries (Å, deg) used in ab initio calculations.

**Figure S1.** Spatially normalized plots<sup>9</sup> of hydrogen bond distances (represented as  $R_{\text{HX}}^3$ ) against angle at the hydrogen (represented as  $1 - \cos(T)$ ,  $T = 180 - (\text{D}-\text{H}\cdots\text{X})$ ) for hydrogen bonds  $\text{D}-\text{H}\cdots\text{X}-\text{M}$ ;  $\text{D} = \text{C}$  (top),  $\text{D} = \text{N}$  (middle),  $\text{D} = \text{O}$  (bottom),  $\text{X} = \text{F}$  (left),  $\text{X} = \text{Cl}$ ,  $\text{X} = \text{Br}$ ,  $\text{X} = \text{I}$  (right).

**Figure S2.** Spatially normalized plots<sup>9</sup> of hydrogen bond distances (represented as  $R_{\text{HX}}^3$ ) against angle at the halogen (represented as  $1 - \cos(A)$ ,  $A = 180 - (\text{H}\cdots\text{X}-\text{M})$ ) for hydrogen bonds  $\text{D}-\text{H}\cdots\text{X}-\text{M}$ ;  $\text{D} = \text{C}$  (top),  $\text{D} = \text{N}$  (middle),  $\text{D} = \text{O}$  (bottom),  $\text{X} = \text{F}$  (left),  $\text{X} = \text{Cl}$ ,  $\text{X} = \text{Br}$ ,  $\text{X} = \text{I}$  (right).

**Figure S3.** Calculated electrostatic potential in the plane perpendicular to the metal coordination plane for the model compounds *trans*-PdX(Me)(PH<sub>3</sub>)<sub>2</sub>;  $\text{X} = \text{F}$ ,  $\text{Cl}$ ,  $\text{Br}$ ,  $\text{I}$ . Electrostatic potential represented with color gradation and contoured at 10 kcal/mol intervals. Only negative and zero contours shown; atoms that lie below the coordination plane are not shown.

**Table S1.** Model geometries (Å, deg) used in ab initio calculations

|        |                    |        |                     |
|--------|--------------------|--------|---------------------|
| Pd-F   | 1.87 <sup>a</sup>  | Pd-P   | 2.33 <sup>a</sup>   |
| Pd-Cl  | 2.42 <sup>a</sup>  | Pd-C   | 2.05 <sup>a</sup>   |
| Pd-Br  | 2.55 <sup>a</sup>  | P-H    | 1.409 <sup>c</sup>  |
| Pd-I   | 2.75 <sup>a</sup>  | C-H    | 1.095 <sup>c</sup>  |
| P-Pd-X | 90.0 <sup>b</sup>  | Pd-P-H | 118.12 <sup>c</sup> |
| P-Pd-C | 90.0 <sup>b</sup>  | Pd-C-H | 112.59 <sup>c</sup> |
| C-Pd-X | 180.0 <sup>b</sup> |        |                     |

a) taken from representative literature crystal structures

b) idealized

c) derived by geometry optimization on the fluoride complex with heavy atom positions fixed.

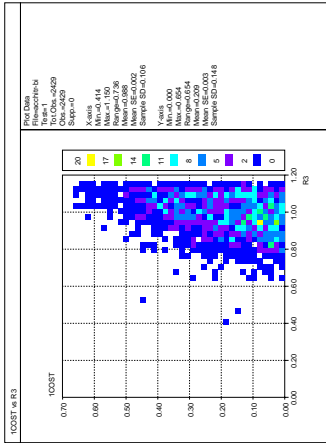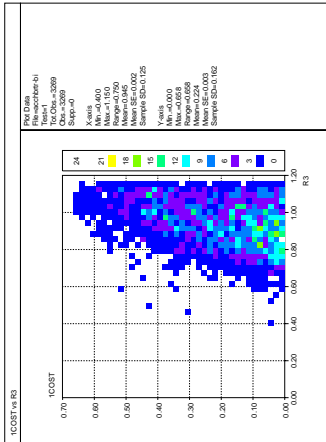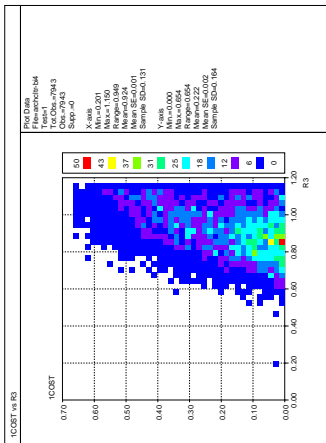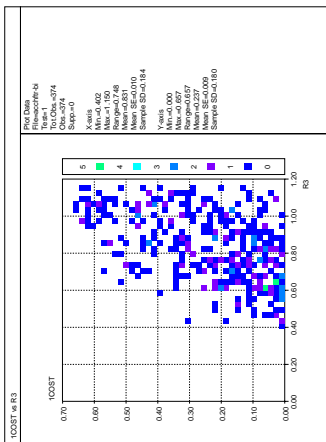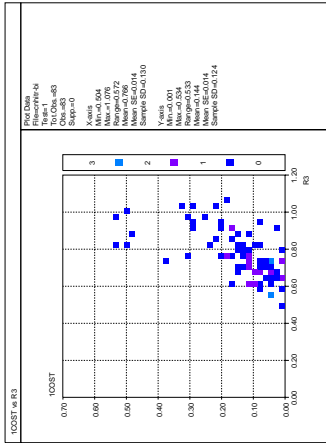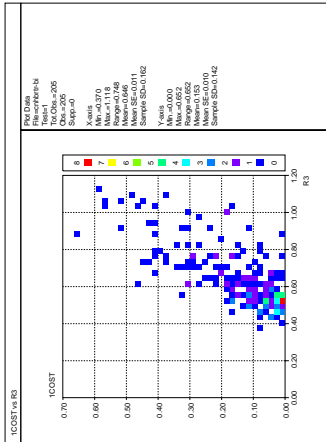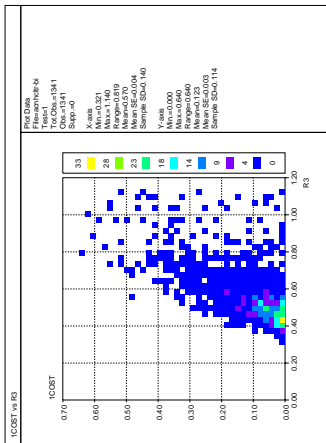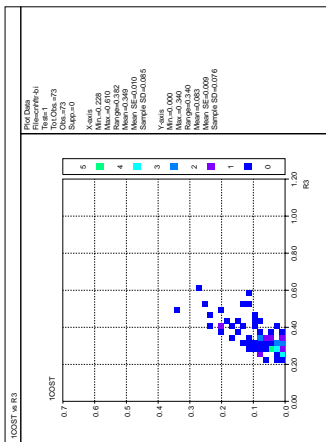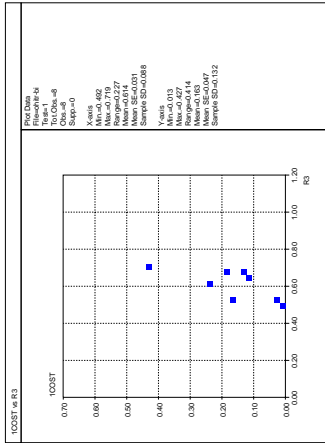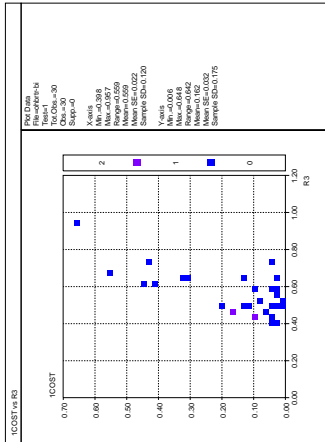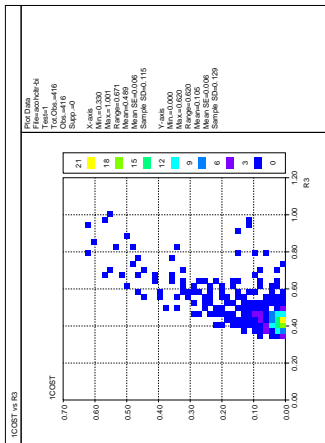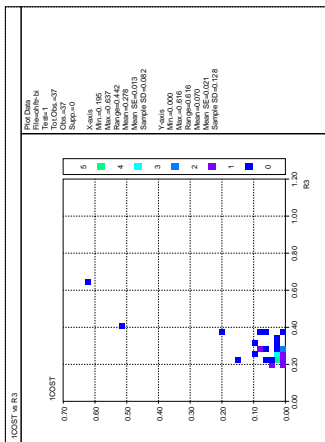

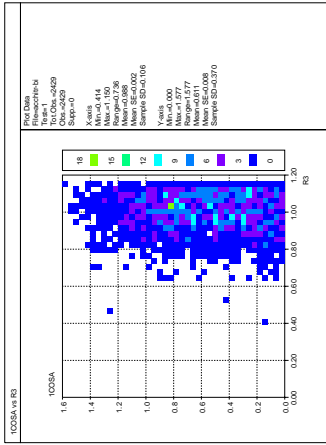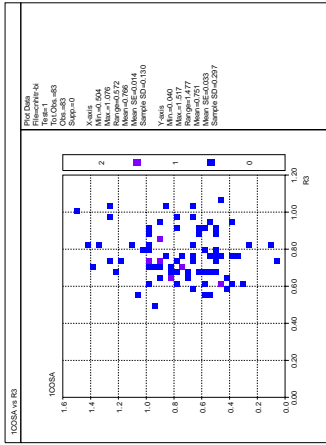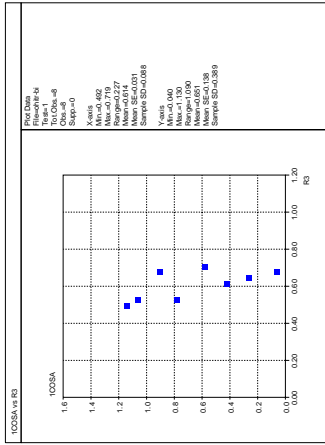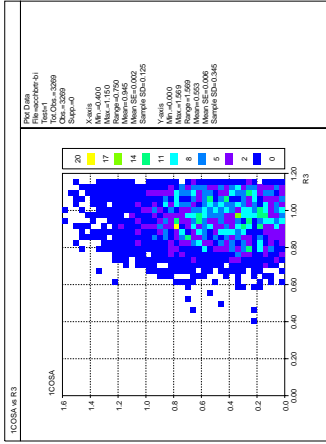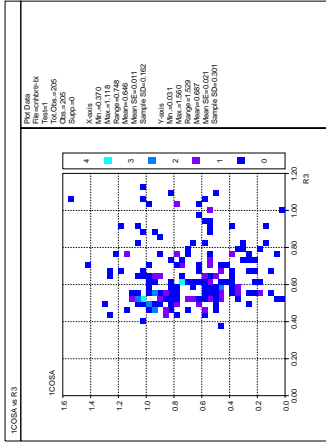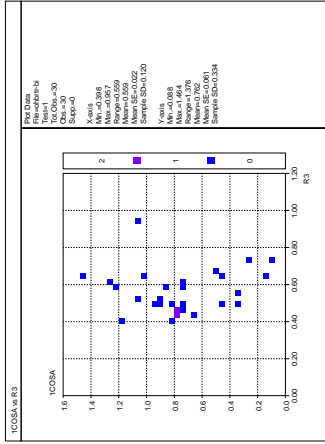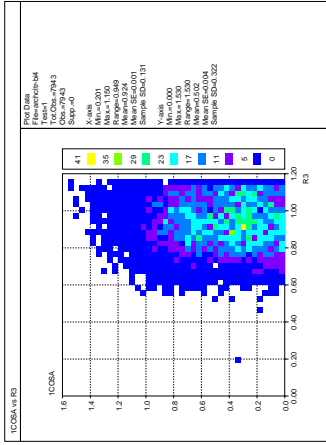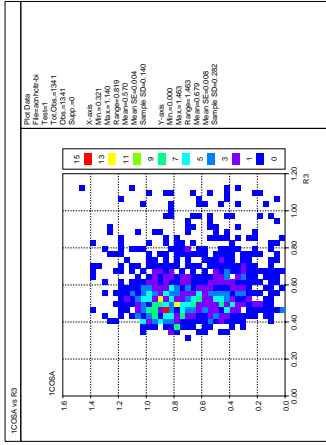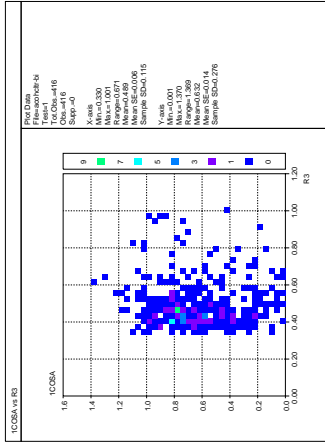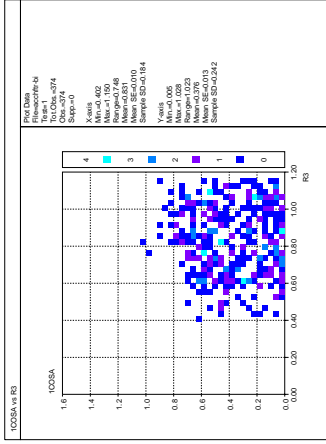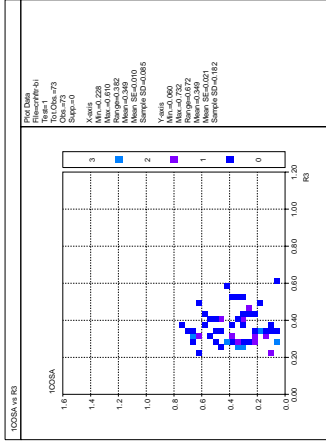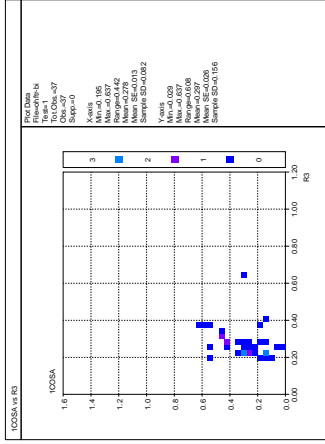

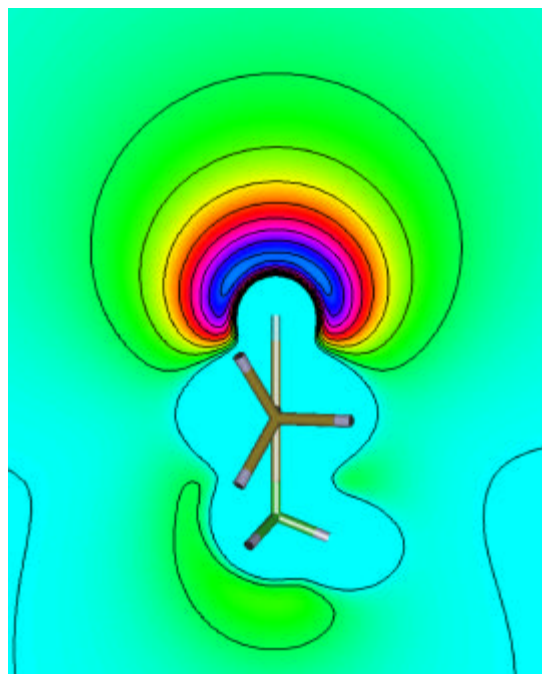

PdF(Me)(PH<sub>3</sub>)<sub>2</sub>

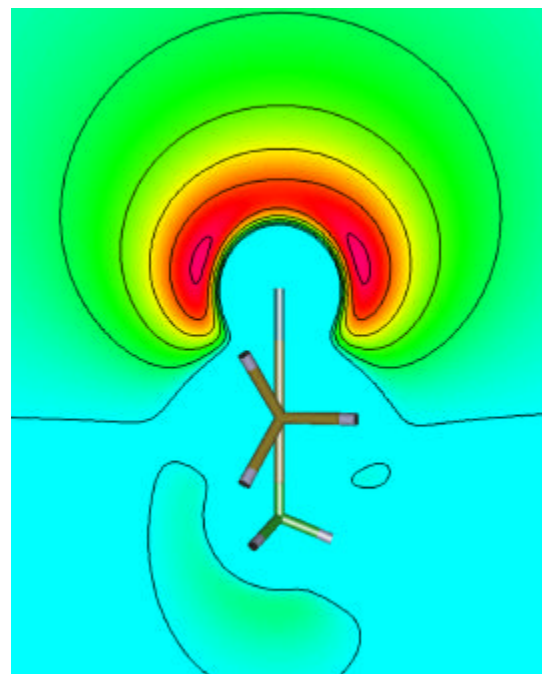

PdCl(Me)(PH<sub>3</sub>)<sub>2</sub>

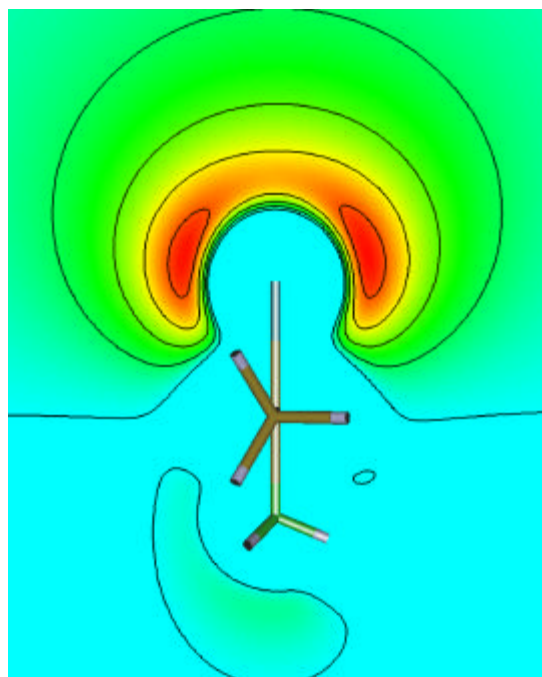

PdBr(Me)(PH<sub>3</sub>)<sub>2</sub>

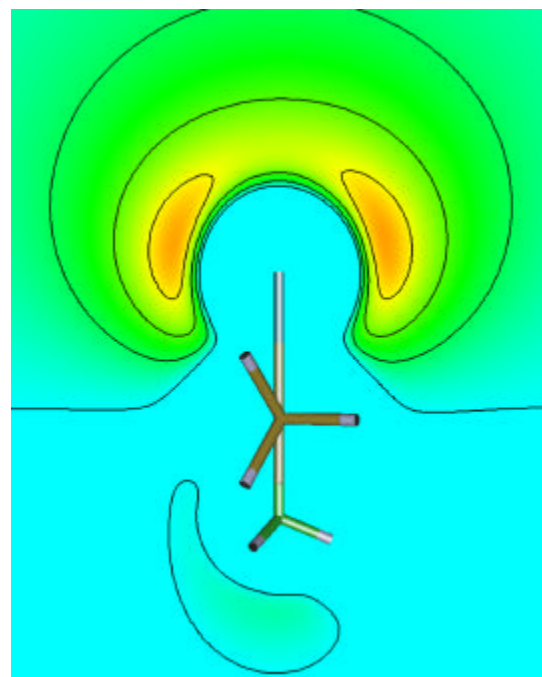

PdI(Me)(PH<sub>3</sub>)<sub>2</sub>

Figure S3.
